# Supplementary material for: Synergistic effect of exposed facets and surface defects of ZnO nanomaterials for photocatalytic ozonation of organic pollutants
Source: Royal Society of Chemistry journal article supplement (doi:10.1039/d3en00235g), 2023-01-01
Supplement: d3en00235g1.pdf [file d3en00235g1.pdf]

## Electronic Supplementary Information

### Synergistic effect of exposed facet and surface defect of ZnO nanomaterials for photocatalytic ozonation of organic pollutants

Yang Yang<sup>a</sup>, Junmin Peng<sup>a</sup>, Huilin Tao<sup>a, b</sup>, Zhou Yang<sup>a</sup>, Yidong Hou<sup>a\*</sup>, Wei Lin<sup>a\*</sup>, Jinshui Zhang<sup>a\*</sup>

**Table S1** Physicochemical properties of ZnO nanomaterials

| Material | Dominant exposed facet | S <sub>BET</sub> (m <sup>2</sup> /g) | O 1s (at%)     |                 |                  |
|----------|------------------------|--------------------------------------|----------------|-----------------|------------------|
|          |                        |                                      | O <sub>I</sub> | O <sub>II</sub> | O <sub>III</sub> |
| ZnO-rod  | {10 $\bar{1}$ 0}       | 0.7                                  | 0.65           | 0.13            | 0.22             |
| ZnO-disk | {0001}                 | 0.4                                  | 0.61           | 0.21            | 0.18             |

The specific surface area was measured by using Brunauer-Emmett-Teller (BET) method. Surface O composition was based on the fitted data from X-ray photoelectron spectroscopy.

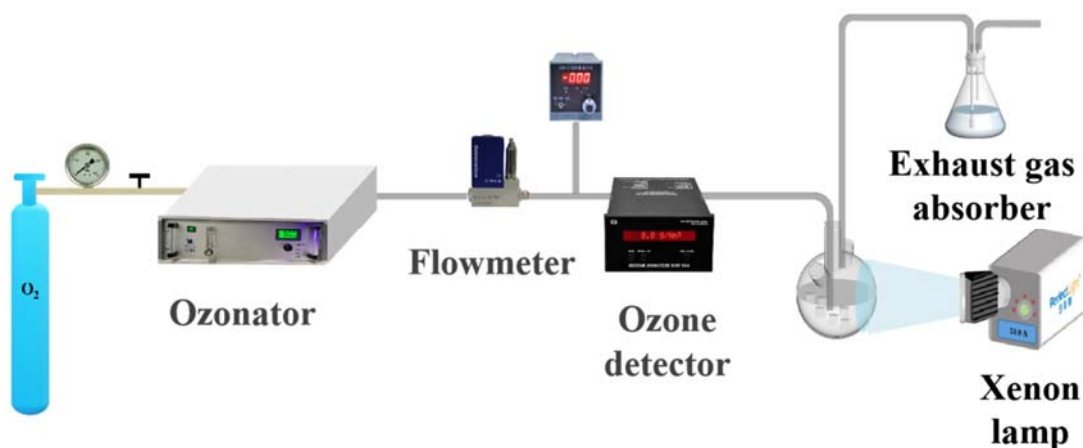

**Fig. S1** Schematic diagram of photocatalytic ozonation reaction equipment.

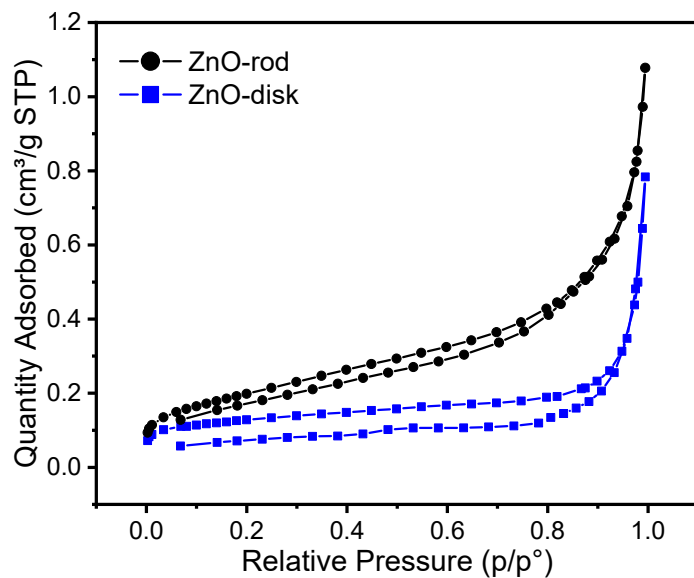

Fig. S2 N<sub>2</sub> adsorption-desorption isotherms of ZnO-rod and ZnO-disk

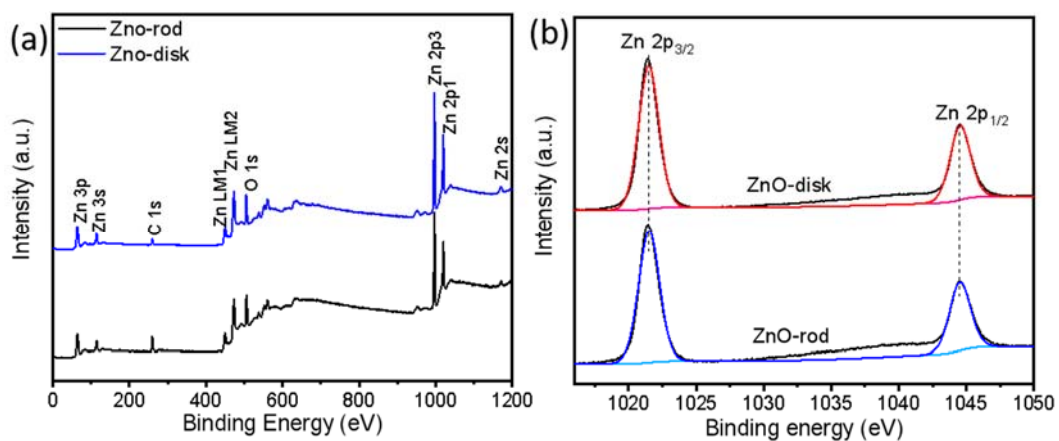

Fig. S3 XPS spectra for ZnO-rod and ZnO-disk, (a) survey spectrum, (b) Zn 2p

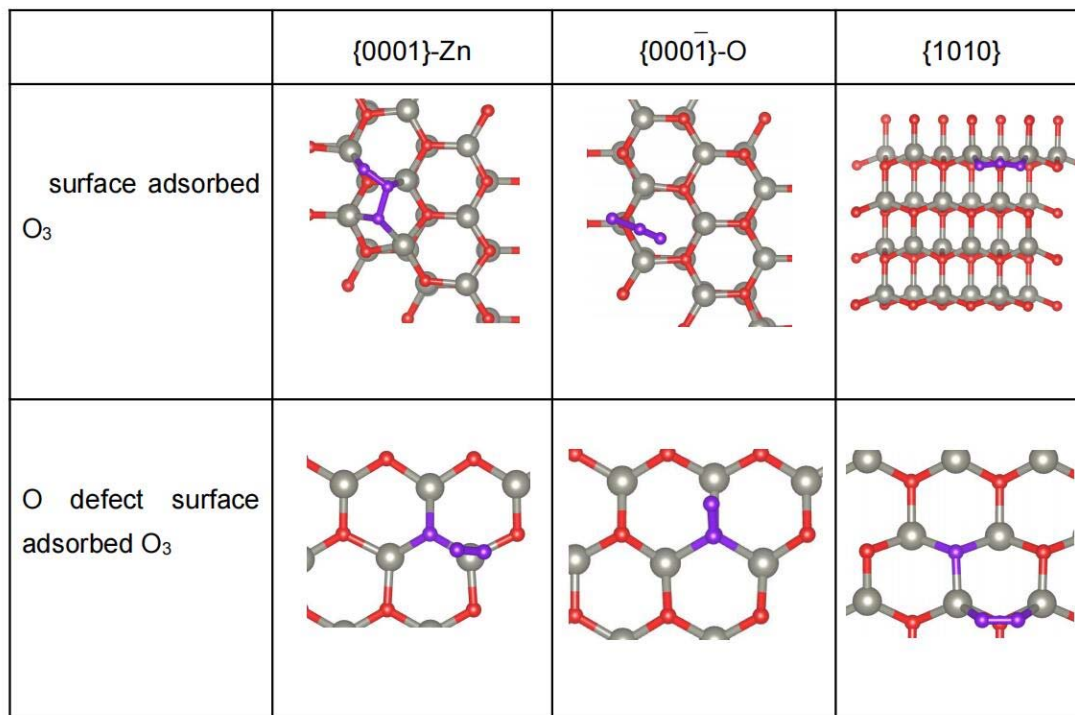

**Fig. S4** Side views of the optimized adsorption geometries and corresponding adsorption energies of  $O_3$  on different crystal facets of ZnO

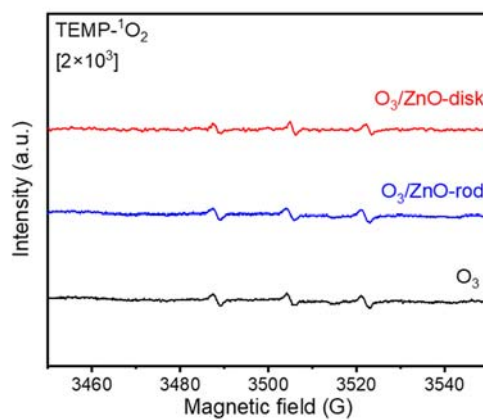

**Fig. S5** EPR spectra of TEMP- $^1O_2$  in different processes

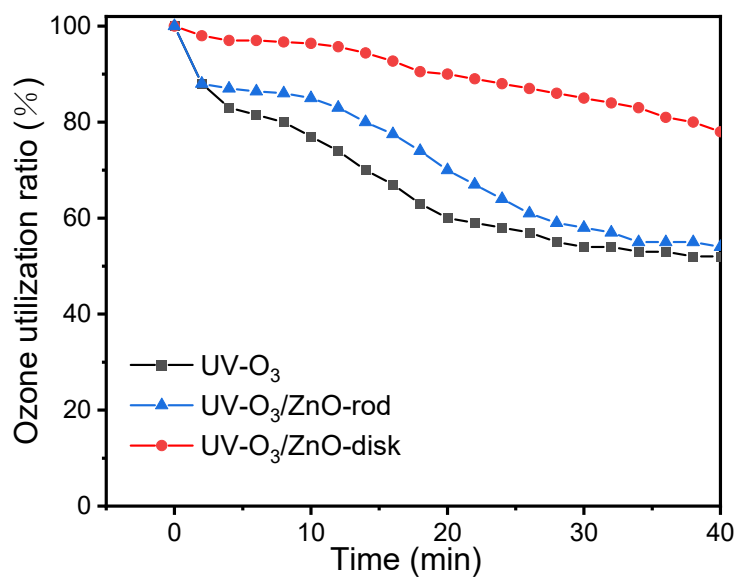

**Fig. S6** Ozone utilization ratio against with the reaction time in the different processes for phenol degradation

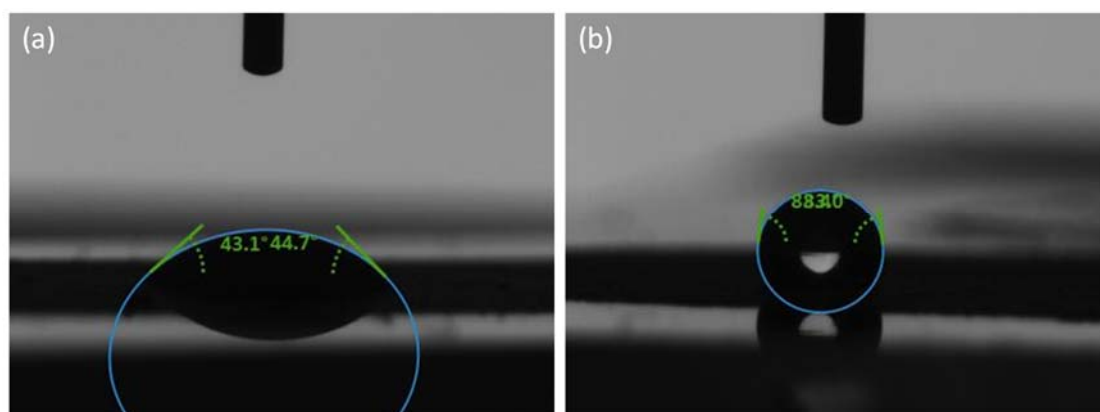

**Fig. S7** Water contact angles for ZnO-disk and ZnO-rod

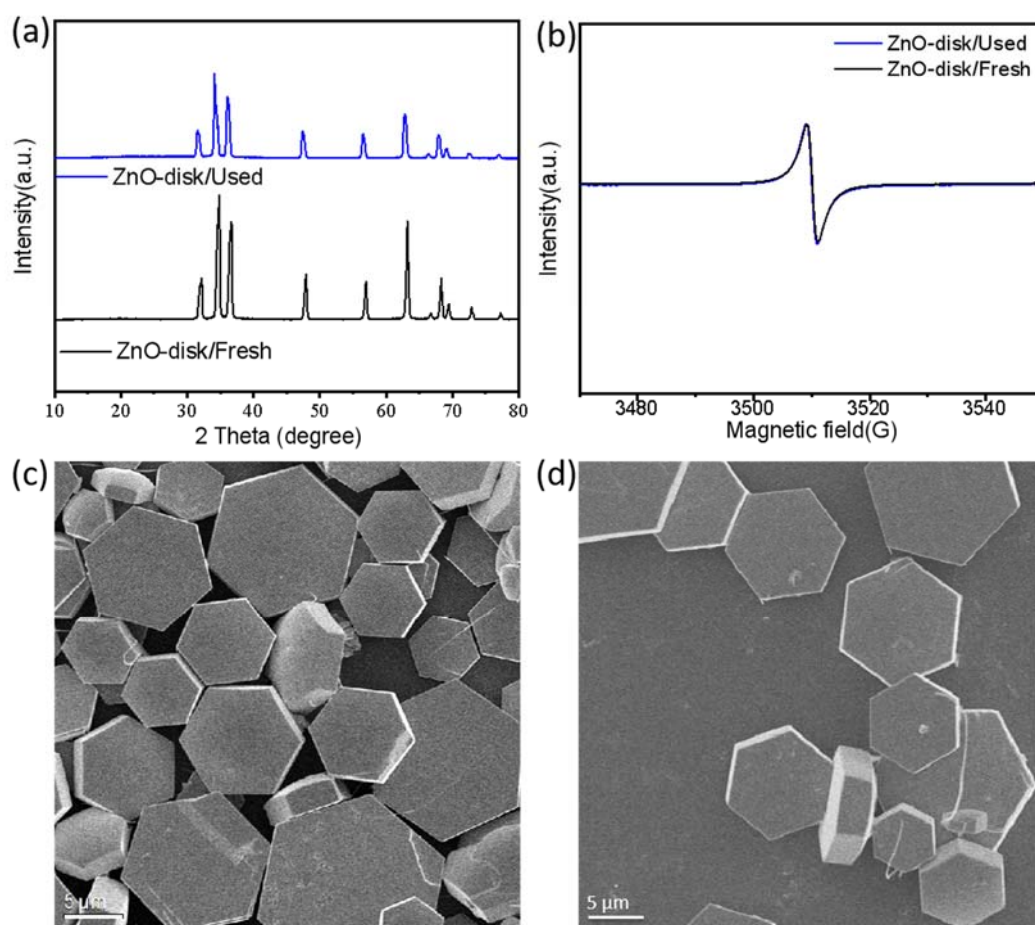

**Fig. S8** (a) XRD patterns, (b) EPR signals and (c-d) SEM images for fresh and used ZnO-disk
